# Supplementary material for: Structural insights into translocation and tailored synthesis of hyaluronan
Source: Springer Nature journal article supplement (doi:10.1038/s41594-024-01389-1), 2024-09-25
Supplement: MOESM1 [file 41594_2024_1389_MOESM1_ESM.pdf › 41594_2024_1389_MOESM1_ESM.pdf]

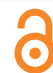

---

# Structural insights into translocation and tailored synthesis of hyaluronan

---

In the format provided by the  
authors and unedited

**Supplementary Table 1** Oligos used to generate all XIHAS1 and CvHAS mutants in this study.

|               |                                                 |
|---------------|-------------------------------------------------|
| xHAS1_H72A_F  | AATGCTTCTCgcCCTGATGATGCAGAG                     |
| xHAS1_H72A_R  | GCAAGACCATAAAGCCCA                              |
| xHAS1_H72F_F  | ggcttgcgaatgcttctctctgatgatgcagagcct            |
| xHAS1_H72F_R  | aggctctgcatcatcaggaagagaagcattgcaagacc          |
| xHAS_K218A_F  | atgcaacagtggggcggagcaagagaggtcatgtacac          |
| xHAS_K218A_R  | gtgtacatgacctctctgtccgccccactgttgc              |
| xHAS_R287A_F  | gttaaacgccatccagtaagccaggctgctcatgaaacta        |
| xHAS_R287A_R  | tagtttcatgagcagcctggcttactggatggcgttaac         |
| xHAS_R296A_F  | TAACGTGGAGgcGGCCTGCCAG                          |
| xHAS_R296A_R  | AACGCCATCCAGTAACGC                              |
| xHAS1_C307A_F | acttcgactgcgtgtccgctataagtggacctctgg            |
| xHAS1_C307A_R | ccagagggtccacttatagcggacacgcagtcgaagt           |
| xHAS1_C307S_F | cttcgactgcgtgtccagtataagtggacctct               |
| xHAS1_C307S_R | agagggtccacttatactggacacgcagtcgaag              |
| xHAS1_C337A_F | agacagaaattttgggaacctatgtactttgggagatgatagacac  |
| xHAS1_C337A_R | gatgtctatcatctccaaagtagcatagggtcccaaaatttctgtct |
| xHAS1_C337S_F | acagaaattttgggaacctatagtactttgggagatgatagac     |
| xHAS1_C337S_R | gtctatcatctccaaagtactatagggtcccaaaatttctgt      |
| xHAS_R381A_F  | CCAGCAAACCgcGTGGACCAAG                          |
| xHAS_R381A_R  | TTCAACCACCGGAGATAC                              |
| xHAS_K448A_F  | GTCTCTCTTCgcATCCATCTATGCC                       |
| xHAS_K448A_R  | ATGATCTGGATGCACAGG                              |
| xHAS1_W491A_F | gacctaaacaagaccggtgcgggaacatctggggcg            |
| xHAS1_W491A_R | cgcccagatgttcccgcaccggtcttctttaaggtc            |
| xHAS1_W491F_F | acctaaacaagaccggttccggaacatctggggcg             |
| xHAS1_W491F_R | gcgcccagatgttccgaaaccggtcttctttaaggt            |
| xHAS1_T493A_F | gaccggttggggagcatctgggcgcaa                     |
| xHAS1_T493A_R | ttgcgcccagatgtccccaaccggtc                      |
| xHAS1_T493S_F | gaccggttggggatcatctgggcgcaa                     |
| xHAS1_T493S_R | ttgcgcccagatgtccccaaccggtc                      |
| xHAS_K218R_F  | gcaacagtggggcggagaagagaggtcatgtac               |
| xHAS_K218R_R  | gtacatgacctctcttctccgccccactgttgc               |
| xHAS_R287K_F  | GAGCAGCCTGaagTACTGGATGG                         |
| xHAS_R287K_R  | ATGAAACTAATGAAGGAATCATAAG                       |
| xHAS_R296K_F  | atggcgtttaacgtggagaaggcctgccag                  |
| xHAS_R296K_R  | ctggcaggccttctccacgttaacgccat                   |
| xHAS_R381K_F  | gtggtgaaccagcaaaccaagtggaccaagtcctactc          |
| xHAS_R381K_R  | gaagtaggacttgggtccactgggttctggttcaaccac         |
| xHAS_R448R_F  | agatcatgtctcttcagatccatctatgcctgtg              |
| xHAS_R448R_R  | cagcaggcatagatggatctgaagagagacatgatct           |
| xHAS1_R496A_F | AACATCTGGGgcgAAGAAGATAGTAGGCAAC                 |
| xHAS1_R496A_R | CCCCAACCGGTCTTG                                 |
| xHAS1_R496K_F | AACATCTGGGaaaAAGAAGATAGTAGGC                    |
| xHAS1_R496K_R | CCCCAACCGGTCTTG                                 |
| CvHAS_G455A_F | GACATTGCTTGGGCCACTCGTGGTG                       |
| CvHAS_G455A_R | CACCACGAGTGGCCCCAAGCAATGTC                      |
| CvHAS_W454A_F | GTTTGACATTGCTGCGGGCACTCGTG                      |
| CvHAS_W454A_R | CACGAGTGCCCGCAGCAATGTCAAAC                      |
| CvHAS_R457K_F | CATTGCTTGGGGCACTAAAGGTGGCAACGCC                 |
| CvHAS_R457K_R | GGCGTTGCCACCTTTAGTGCCCCAAGCAATG                 |
| CvHAS_W454F_F | GTTTGACATTGCTTTCGGCACTCGTG                      |
| CvHAS_W454F_R | CACGAGTGCCGAAAGCAATGTCAAAC                      |

### Supplementary Figure 1 Model of HA biosynthesis and translocation.

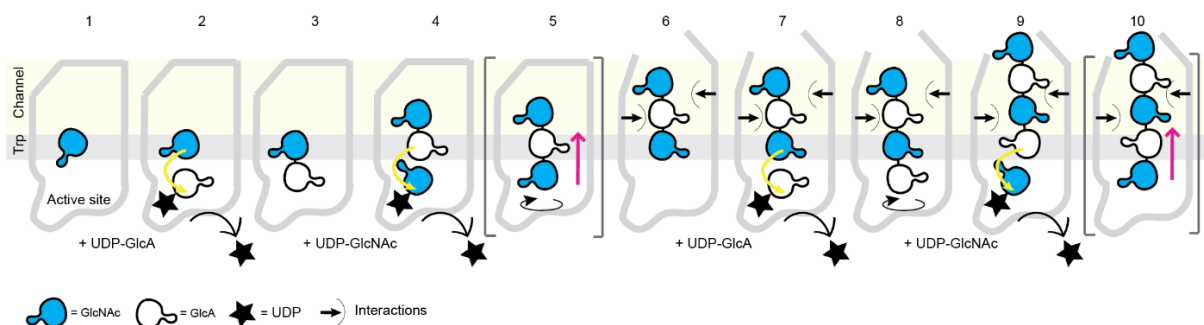

### Supplementary Discussion on HA biosynthesis and translocation.

Predicted solution and experimentally determined high resolution structures of HA suggest a preferred orientation of the disaccharide's GlcA and GlcNAc units where the carboxylate and acetamido groups point roughly in the same direction. Specifically, the carboxylate group of the glucuronic acid unit at the disaccharide's reducing end is in close proximity (but not necessarily in hydrogen bonding distance) to GlcNAc's acetamido nitrogen at the disaccharide's non-reducing end. Often, this configuration is stabilized by a hydrogen bond between the ring oxygen of the non-reducing end sugar with the C3 or C4 hydroxyl (for GlcA and GlcNAc, respectively) of the sugar unit at the reducing end of the repeat unit. Within a polymer, the disaccharide repeats can rotate around the glycosidic bonds and particular configurations can be stabilized by interactions with proteinaceous receptors. These HA properties likely affect its coordination, elongation, and translocation by HAS.

Experimental structures of primed HAS reveal that the priming GlcNAc unit is coordinated in a specific binding pose with its acetamido group pointing away from the base catalyst (for simplicity, this is referred to as 'pointing left'). Extending the primer with GlcA at its C3 hydroxyl (i.e. GlcA being at the non-reducing end) creates a HA disaccharide with the acetamido and carboxylate groups pointing in opposite directions and both glycopyranose rings being roughly co-planar. Next, adding a GlcNAc moiety to the C4 hydroxyl of the GlcA unit creates a trisaccharide. Based on the observations described above, this terminal GlcNAc unit then likely rotates around the newly formed glycosidic bond, such that its acetamido group points 'right' (towards the base catalyst), in the same direction as the carboxylate of the preceding GlcA unit. In this configuration, all three glycopyranose rings would, approximately, be in the same plane. Translocating this trisaccharide by one sugar unit prior to another elongation reaction places the GlcNAc unit at the acceptor site in the opposite direction as observed for the priming GlcNAc unit (with its acetamido group pointing 'right'). While a GlcNAc monosaccharide primer does not seem to be stably bound in this orientation, a GlcNAc acceptor within a polymer may be stabilized in this orientation by the polymer itself. Similar polymer-stabilized acceptor poses may exist in cellulose and chitin, which are homopolysaccharides of glucose and GlcNAc, respectively.

Adding a GlcA unit to this GlcNAc-ending trisaccharide likely favors its rotation around the newly formed connection. This places its carboxylate group to the 'left' and aligns the plane of its glycopyranose ring with the preceding polymer, thereby facilitating translocation.

Based on this model, the HA disaccharide repeat units enter the TM channel in two different orientations with the carboxylate and acetamido substituents either pointing 'left' or 'right'. Accordingly, the polymer density of our HA-bound HAS structure likely represents an ensemble average of two different polymer orientations. However, we cannot exclude that one polymer pose is advantageous for *in vitro* structural analysis, thereby explaining the apparently better fit of the modeled orientation with the EM map.
