# Supplementary material for: Structural insights into translocation and tailored synthesis of hyaluronan
Source: Springer Nature journal article supplement (doi:10.1038/s41594-024-01389-1), 2024-09-25
Supplement: MOESM3 [file 41594_2024_1389_MOESM3_ESM.pdf › 41594_2024_1389_MOESM3_ESM.pdf]

## Peer Review Information

---

**Journal:** Nature Structural & Molecular Biology

**Manuscript Title:** Structural insights into translocation and tailored synthesis of hyaluronan

**Corresponding author name(s):** Jochen Zimmer

### Editorial Notes:

**Transferred manuscripts** This manuscript has been previously reviewed at another journal that is not operating a transparent peer review scheme. This document only contains reviewer comments, rebuttal and decision letters for versions considered at Nature Structural & Molecular Biology.

### Reviewer Comments & Decisions:

|                                          |
|------------------------------------------|
| <b>Decision Letter, initial version:</b> |
|------------------------------------------|

**Message:** Our ref: NSMB-A49062-T

23rd Apr 2024

Dear Dr. Zimmer,

Thank you for submitting your revised manuscript "Structural insights into translocation and tailored synthesis of hyaluronan" (NSMB-A49062-T). It has now been seen by the original referees and their comments are below. The reviewers find that the paper has improved in revision, and therefore we'll be happy in principle to publish it in Nature Structural & Molecular Biology, pending minor revisions to satisfy the referees' final requests and to comply with our editorial and formatting guidelines.

We are now performing detailed checks on your paper and will send you a checklist detailing our editorial and formatting requirements in about a week. Please do not upload the final materials and make any revisions until you receive this additional information from us.

To facilitate our work at this stage, it is important that we have a copy of the main text as

a word file. If you could please send along a word version of this file as soon as possible, we would greatly appreciate it; please make sure to copy the NSMB account (cc'ed above).

Thank you again for your interest in Nature Structural & Molecular Biology Please do not hesitate to contact me if you have any questions.

Sincerely,

Katarzyna Ciazynska, PhD  
(she/her)  
Associate Editor  
Nature Structural & Molecular Biology  
<https://orcid.org/0000-0002-9899-2428>

Reviewer #2 (Remarks to the Author):

Compared to the previous version, the authors have made minor changes to the manuscript, especially in the discussion section. I believe that the necessary changes are in place. I have the following suggestions, which are mostly minor, but need to be addressed before publication.

1. The manuscript has toned down from the "length control mechanism" to "molecular basis for HAS engineering" and changed the title to "tailored synthesis". I think this is ok.
2. The comprehensive comparison between xHAS and CvHAS. The figures have been modified in Extended data Fig 6. The differences have been summarized as "Comparing the N-terminal regions of XIHAS1 and CvHAS1 shows that (a) TM1 is missing in CvHAS, (b) TM2 is not as 'open' (i.e. bent outwards) in CvHAS as it is in XIHAS1, and (c) the loop connecting TM1 and TM2 is also disordered in CvHAS, instead of closing a lateral opening towards the bilayer, as observed in XIHAS1. Some loop residues are within 3-5 Å from the translocating HA polymer." I think it may be better if the authors can incorporate these before they draw the conclusion such as "CvHAS' poor processivity is founded in differences within its transmembrane architecture, evidenced by structural flexibility of its N-terminal region. We refer to this as differences in architectural dynamics."
3. Still regarding point 2 in the rebuttal letter, the question "However, it remains unclear how HA coordination differs across the three tested conditions: detergent micelle, IMV, and algae in vivo." is not answered by the authors. The authors need to explain what the expected effect of these different biochemical condition on the dynamics of the TM region is and how they correlate to the experimental observation of the product length.
4. The modified Figure 6 seems good to me. However, the old figure 6 which has been moved into supplementary discussion still needs some modification. The comment "the blue and white sugar should be labeled as GlcNAc and GlcA, respectively, instead of being labeled as blue and blue/white squares." in the rebuttal letter is not addressed. The labels for GlcNAc and GlcA have not been revised. Please see the figure below and just label the blue sugar GlcNAc, the white sugar GlcA and remove the squares.

5. The method for liposome reconstitution is missing. Previously, the reviewer thought that the CvHAS lip in Extended data figure 6f corresponds to the IMV preparation in the method session but based on the rebuttal letter, this is different from IMV. Therefore, the authors need to provide the method accordingly.

Reviewer #3 (Remarks to the Author):

Gorniak et al analyze the mechanism of hyaluronate synthase using cryo electron microscopy, and a variety of assays.

The authors have addressed all of my remaining concerns. Framing the issue in terms of elongation rather than length control bypasses any issues around substrate release. And I agree that their mechanistic suggestion, while complex and currently unproven, is at least plausible and testable. Ultimately this paper represents a substantial amount of effort and moves the field forwards considerably.

#### Author Rebuttal to Initial comments

Please see below for our response to the reviewers' comments.

Reviewer #2:

Remarks to the Author:

Compared to the previous version, the authors have made minor changes to the manuscript, especially in the discussion session. I believe that the necessary changes are in place. I have the following suggestions, which are mostly minor, but need to be addressed before publication.

1. The manuscript has toned down from the "length control mechanism" to "molecular basis for HAS engineering" and changed the title to "tailored synthesis". I think this is ok.

> Good

2. The comprehensive comparison between xHAS and CvHAS. The figures have been modified in Extended data Fig 6. The differences have been summarized as "Comparing the N-terminal regions of XIHAS1 and CvHAS1 shows that (a) TM1 is missing in CvHAS, (b) TM2 is not as 'open' (i.e. bent outwards) in CvHAS as it is in XIHAS1, and (c) the loop connecting TM1 and TM2 is also disordered in CvHAS, instead of closing a lateral opening towards the bilayer, as observed in XIHAS1. Some loop residues are within 3-5 Å from the translocating HA polymer." I think it may be better if the authors can incorporate these before they draw the conclusion such

as “CvHAS’ poor processivity is founded in differences within its transmembrane architecture, evidenced by structural flexibility of its N-terminal region. We refer to this as differences in architectural dynamics.”

> The referenced text is from our rebuttal letter. The same observations are already listed in the Discussion, lines 334-343, thereby explaining our interpretation. It is unclear what the reviewer refers to by “I think it may be better if the authors can incorporate these before they draw the conclusion....”.

3. Still regarding point 2 in the rebuttal letter, the question “However, it remains unclear how HA coordination differs across the three tested conditions: detergent micelle, IMV, and algae in vivo.” is not answered by the authors. The authors need to explain what the expected effect of these different biochemical condition on the dynamics of the TM region is and how they correlate to the experimental observation of the product length.

> The text has been revised, line 251: “This effect is likely caused by various membrane mimetics having stabilizing or destabilizing effect on CvHAS’ transmembrane domain and consequently HA coordination.”

4. The modified Figure 6 seems good to me. However, the old figure 6 which has been moved into supplementary discussion still needs some modification. The comment “the blue and white sugar should be labeled as GlcNAc and GlcA, respectively, instead of being labeled as blue and blue/white squares.” in the rebuttal letter is not addressed. The labels for GlcNAc and GlcA have not been revised. Please see the figure below and just label the blue sugar GlcNAc, the white sugar GlcA and remove the squares.

> The supplemental figure has been revised, as requested. The internationally accepted symbols for GlcNAc and GlcA have been removed.

5. The method for liposome reconstitution is missing. Previously, the reviewer thought that the CvHAS lip in Extended data figure 6f corresponds to the IMV preparation in the method session but based on the rebuttal letter, this is different from IMV. Therefore, the authors need to provide the method accordingly.

> Added

Reviewer #3:

Remarks to the Author:

Gorniak et al analyze the mechanism of hyaluronate synthase using cryo electron microscopy, and a variety of assays.

The authors have addressed all of my remaining concerns. Framing the issue in terms of elongation rather than length control bypasses any issues around substrate release. And I agree that their mechanistic suggestion, while complex and currently unproven, is at least plausible and testable. Ultimately this paper represents a substantial amount of effort and moves the field forwards considerably.

> [Thanks](#)

|                               |
|-------------------------------|
| <b>Final Decision Letter:</b> |
|-------------------------------|

**Message:** 14th Aug 2024

Dear Dr. Zimmer,

We are now happy to accept your revised paper "Structural insights into translocation and tailored synthesis of hyaluronan" for publication as an Article in Nature Structural & Molecular Biology.

Acceptance is conditional on the manuscript's not being published elsewhere and on there being no announcement of this work to the newspapers, magazines, radio or television until the publication date in Nature Structural & Molecular Biology.

Over the next few weeks, your paper will be copyedited to ensure that it conforms to Nature Structural & Molecular Biology style. Once your paper is typeset, you will receive an email with a link to choose the appropriate publishing options for your paper and our Author Services team will be in touch regarding any additional information that may be required.

After the grant of rights is completed, you will receive a link to your electronic proof via email with a request to make any corrections within 48 hours. If, when you receive your proof, you cannot meet this deadline, please inform us at [rjsproduction@springernature.com](mailto:rjsproduction@springernature.com) immediately.

You will not receive your proofs until the publishing agreement has been received through our system.

Due to the importance of these deadlines, we ask that you please let us know now whether

you will be difficult to contact over the next month. If this is the case, we ask you provide us with the contact information (email, phone and fax) of someone who will be able to check the proofs on your behalf, and who will be available to address any last-minute problems.

To assist our authors in disseminating their research to the broader community, our SharedIt initiative provides all co-authors with the ability to generate a unique shareable link that will allow anyone (with or without a subscription) to read the published article. Recipients of the link with a subscription will also be able to download and print the PDF.

As soon as your article is published, you can generate your shareable link by entering the DOI of your article here: <http://authors.springernature.com/share>. Corresponding authors will also receive an automated email with the shareable link

Note the policy of the journal on data deposition:  
<http://www.nature.com/authors/policies/availability.html>.

Your paper will be published online soon after we receive proof corrections and will appear in print in the next available issue. You can find out your date of online publication by contacting the production team shortly after sending your proof corrections.

You may wish to make your media relations office aware of your accepted publication, in case they consider it appropriate to organize some internal or external publicity. Once your paper has been scheduled you will receive an email confirming the publication details. This is normally 3-4 working days in advance of publication. If you need additional notice of the date and time of publication, please let the production team know when you receive the proof of your article to ensure there is sufficient time to coordinate. Further information on our embargo policies can be found here:  
<https://www.nature.com/authors/policies/embargo.html>

You can now use a single sign-on for all your accounts, view the status of all your manuscript submissions and reviews, access usage statistics for your published articles and download a record of your refereeing activity for the Nature journals.

If you have not already done so, we strongly recommend that you upload the step-by-step protocols used in this manuscript to the Protocol Exchange. Protocol Exchange is an open online resource that allows researchers to share their detailed experimental know-how. All uploaded protocols are made freely available, assigned DOIs for ease of citation and fully searchable through nature.com. Protocols can be linked to any publications in which they are

used and will be linked to from your article. You can also establish a dedicated page to collect all your lab Protocols. By uploading your Protocols to Protocol Exchange, you are enabling researchers to more readily reproduce or adapt the methodology you use, as well as increasing the visibility of your protocols and papers. Upload your Protocols at [www.nature.com/protocolexchange/](http://www.nature.com/protocolexchange/). Further information can be found at [www.nature.com/protocolexchange/about](http://www.nature.com/protocolexchange/about).

An online order form for reprints of your paper is available at <https://www.nature.com/reprints/author-reprints.html>. Please let your coauthors and your institutions' public affairs office know that they are also welcome to order reprints by this method.

Please note that *Nature Structural & Molecular Biology* is a Transformative Journal (TJ). Authors may publish their research with us through the traditional subscription access route or make their paper immediately open access through payment of an article-processing charge (APC). Authors will not be required to make a final decision about access to their article until it has been accepted. [Find out more about Transformative Journals](#)

**Authors may need to take specific actions to achieve [compliance](#) with funder and institutional open access mandates.** If your research is supported by a funder that requires immediate open access (e.g. according to [Plan S principles](#)) then you should select the gold OA route, and we will direct you to the compliant route where possible. For authors selecting the subscription publication route, the journal's standard licensing terms will need to be accepted, including [self-archiving policies](#). Those licensing terms will supersede any other terms that the author or any third party may assert apply to any version of the manuscript.

In approximately 10 business days you will receive an email with a link to choose the appropriate publishing options for your paper and our Author Services team will be in touch regarding any additional information that may be required.

You will not receive your proofs until the publishing agreement has been received through our system.

If you have any questions about our publishing options, costs, Open Access requirements, or our legal forms, please contact [ASJournals@springernature.com](mailto:ASJournals@springernature.com)

Sincerely,

Katarzyna Ciazynska, PhD  
(she/her)  
Associate Editor  
Nature Structural & Molecular Biology  
<https://orcid.org/0000-0002-9899-2428>
